# Supplementary material for: Radiofrequency Ablation for Adenomyosis
Source: MDPI journal article supplement (doi:10.3390/jcm12093069), 2023-04-23
Supplement: s1 [file s1]

Supplementary Table S2: Study Properties

| Author                                                                                                                                                                                                                                         | Diagnostic Modality |                                  |      |                                                                                                                                                         | Adenomyosis Specifications |            |              |          |           |         |              | Procedure Specifications RFA |               |              |                       |                                                                          |                                                                               |                | Accompanying disease     |                          |          |  |
|------------------------------------------------------------------------------------------------------------------------------------------------------------------------------------------------------------------------------------------------|---------------------|----------------------------------|------|---------------------------------------------------------------------------------------------------------------------------------------------------------|----------------------------|------------|--------------|----------|-----------|---------|--------------|------------------------------|---------------|--------------|-----------------------|--------------------------------------------------------------------------|-------------------------------------------------------------------------------|----------------|--------------------------|--------------------------|----------|--|
|                                                                                                                                                                                                                                                | MRI                 | Applied Criteria/Reference       | TVUS | Applied Criteria/Reference                                                                                                                              | Type                       |            | Localization |          |           |         |              | Access                       |               |              | Biopsy of Lesion      | RFA margin                                                               | Pretreatment                                                                  | Endometriosis  | concurrent endo. Surgery | history of endo. Surgery | Fibroids |  |
|                                                                                                                                                                                                                                                |                     |                                  |      |                                                                                                                                                         | Focal                      | Diffuse    | Adeno myoma  | Anterior | Posterior | Lateral | Fundal/ Both | Laparoscopic                 | Transcervical | Percutaneous |                       |                                                                          |                                                                               |                |                          |                          |          |  |
| Lin XL, 2020                                                                                                                                                                                                                                   | 1                   | n/a                              | 1    | n/a                                                                                                                                                     | n/a                        | n/a        | n/a          | 51.0%    | 4.6%      | 44.6%   | n/a          | 0                            | 0             | 1            | n/a                   | 3-5mm (serosa and endometrium)                                           | n/a                                                                           | excluded (OMA) | 0                        | 0                        | excluded |  |
| Nam JH, 2020                                                                                                                                                                                                                                   | 0                   | n/a                              | 1    | "Enlarged globular uterus, myometrial cyst, linear myometrial striations, poor delineation of the endomyometrial junction and heterogeneous myometrium" | 79%                        | 21%        | n/a          | 16.0%    | 63.0%     | n/a     | 21.0%        | 0                            | 1             | 0            | CNB                   | 10mm (serosa and endometrium)                                            | GnRH Agonist (1-6 months) for Pt. With enlarged uterus >14 weeks of gestation | 17.3% (14)     | 0                        | 1                        | n/a      |  |
| Hai N, 2017                                                                                                                                                                                                                                    | 1                   | Reinhold; Hum Reprod Update 1998 | 1    | Fedele L, Am J Obstet Gynecol 1992                                                                                                                      | 81.5% (66)                 | 18.5% (15) | n/a          | 30.3%    | 57.6%     | n/a     | 12.1%        | 0                            | 1             | 0            | CNB (uncertain cases) | discontinuation if 80–90% of the volumetric lesion turned hyperechogenic | n/a                                                                           | excluded       | 0                        | 0                        | excluded |  |
| Hai N, 2021                                                                                                                                                                                                                                    | 0                   | n/a                              | 1    | n/a                                                                                                                                                     | n/a                        | n/a        | n/a          | 39.0%    | 66.2%     | n/a     | 12.5%        | 0                            | 1             | 0            | n/a                   | discontinuation if 80–90% of the volumetric lesion turned hyperechogenic | n/a                                                                           | n/a            | 0                        | 0                        | excluded |  |
| Scarperi S, 2015                                                                                                                                                                                                                               | 0                   | n/a                              | 1    | Abrao MS, Hum Reprod. 2007                                                                                                                              | 100%                       | n/a        | n/a          | 27.0%    | 53.0%     | n/a     | 20.0%        | 1                            | 0             | 0            | CNB                   | n/a                                                                      | n/a                                                                           | excluded       | 1                        | 0                        | excluded |  |
| Stepniowska AK, 2022                                                                                                                                                                                                                           | 0                   | n/a                              | 1    | T Bosch Van den M; Ultrasound Obstet Gynecol. 2015                                                                                                      | 55% (33)                   | 22% (13)   | 23% (14)     | 15.0%    | 58.0%     |         | 10.0%        | 1                            | 0             | 0            | n/a                   | n/a                                                                      | n/a                                                                           | 65% (39)       | 1                        | 1 (37% n=22)             | excluded |  |
| Sha A Dai Ti WFE, 2018                                                                                                                                                                                                                         | 0                   | n/a                              | 1    | n/a                                                                                                                                                     | n/a                        | n/a        | n/a          | n/a      | n/a       | n/a     | n/a          | 0                            | 1             | 0            | n/a                   | n/a                                                                      | n/a                                                                           | n/a            | 0                        | 0                        | n/a      |  |
|                                                                                                                                                                                                                                                | Weighted Mean       |                                  |      |                                                                                                                                                         | 75%                        | 20%        |              | 30%      | 51%       |         | 15%          |                              |               |              |                       |                                                                          |                                                                               |                |                          |                          |          |  |
|                                                                                                                                                                                                                                                | Weighted SD ±       |                                  |      |                                                                                                                                                         | 12.7%                      | 1.5%       |              | 13.2%    | 21.8%     |         | 4.4%         |                              |               |              |                       |                                                                          |                                                                               |                |                          |                          |          |  |
| Studies:                                                                                                                                                                                                                                       |                     |                                  |      |                                                                                                                                                         |                            |            |              |          |           |         |              |                              |               |              |                       |                                                                          |                                                                               |                |                          |                          |          |  |
| Reinhold; Imaging features of adenomyosis. Hum Reprod Update 1998                                                                                                                                                                              |                     |                                  |      |                                                                                                                                                         |                            |            |              |          |           |         |              |                              |               |              |                       |                                                                          |                                                                               |                |                          |                          |          |  |
| Fedele L. Transvaginal ultrasonography in the differential diagnosis of adenomyoma versus leiomyoma. Am J Obstet Gynecol 1992;                                                                                                                 |                     |                                  |      |                                                                                                                                                         |                            |            |              |          |           |         |              |                              |               |              |                       |                                                                          |                                                                               |                |                          |                          |          |  |
| Abrao MS; Comparison between clinical examination, transvaginal sonography and magnetic resonance imaging for the diagnosis of deep endometriosis. Hum Reprod. 2007                                                                            |                     |                                  |      |                                                                                                                                                         |                            |            |              |          |           |         |              |                              |               |              |                       |                                                                          |                                                                               |                |                          |                          |          |  |
| T Bosch Van den M; Terms, definitions and measurements to describe sonographic features of myometrium and uterine masses: a consensus opinion from the morphological uterus sonographic assessment (MUSA) group Ultrasound Obstet Gynecol 2015 |                     |                                  |      |                                                                                                                                                         |                            |            |              |          |           |         |              |                              |               |              |                       |                                                                          |                                                                               |                |                          |                          |          |  |
| Abbreviations:                                                                                                                                                                                                                                 |                     |                                  |      |                                                                                                                                                         |                            |            |              |          |           |         |              |                              |               |              |                       |                                                                          |                                                                               |                |                          |                          |          |  |
| OMA: Ovarian Endometrioma                                                                                                                                                                                                                      |                     |                                  |      |                                                                                                                                                         |                            |            |              |          |           |         |              |                              |               |              |                       |                                                                          |                                                                               |                |                          |                          |          |  |
| CNB: Core Needle Biopsy                                                                                                                                                                                                                        |                     |                                  |      |                                                                                                                                                         |                            |            |              |          |           |         |              |                              |               |              |                       |                                                                          |                                                                               |                |                          |                          |          |  |
