# Supplementary material for: Radiofrequency Ablation for Adenomyosis
Source: MDPI journal article supplement (doi:10.3390/jcm12093069), 2023-04-23
Supplement: s1 [file s1]

### Supplementary Table S3: Outcome 1

| Author                         | No. Of Patients | Adenomyosis Symptoms                |                |               |             |            |                | AUB            |          | Reinterventions                  |                                  |                                         |                                | Complications  |                                                                                |                                  |               | Reproductive Outcome |               |                                     |
|--------------------------------|-----------------|-------------------------------------|----------------|---------------|-------------|------------|----------------|----------------|----------|----------------------------------|----------------------------------|-----------------------------------------|--------------------------------|----------------|--------------------------------------------------------------------------------|----------------------------------|---------------|----------------------|---------------|-------------------------------------|
|                                |                 | Baseline                            |                |               | Outcome     |            |                | Outcome        |          | Total (%)<br>(mean months)       | Repeat RFA<br>(mean months)      | Hormonal treatment/IUD<br>(mean months) | Hysterectomy<br>(mean months)  | Pain           | Minor                                                                          | Major                            | Synechia      | total                | in n patients | preterm deliver                     |
|                                |                 | Dysmenorrhea                        | AUB            | Both          | Complete    | Partial    | No improvement | Persisting AUB | % Change |                                  |                                  |                                         |                                |                |                                                                                |                                  |               |                      |               |                                     |
| Lin XL, 2020                   | 65              | 81.5%<br>(53)                       | n/a            | n/a           | 49.3% (26)  | 43.1% (23) | 7.6%<br>(4)    | n/a            | n/a      | n/a                              | n/a                              | n/a                                     | n/a                            | abdominal pain | vaginal discharge<br>low grade fever (<14d)                                    | 0                                | n/a           | n/a                  | n/a           | n/a                                 |
| Nam JH, 2020                   | 81              | 22.4%<br>(13)                       | 6.9%<br>(4)    | 70.1%<br>(41) | n/a         | n/a        | n/a            | n/a            | n/a      | 39.5%<br>(n=32)<br>(41.4, 9-105) | 23.5%<br>(n=19)<br>(41.4, 9-105) | 7.4%<br>(n=6)<br>(30.3, 7-80)           | 9.9%<br>(n=8)<br>(50.1, 6-120) | n/a            | 2<br>(vaginal discharge)                                                       | 1<br>(expulsion necrotic tissue) | 2.5%<br>(n=2) | 39                   | 36%<br>(n=29) | 2<br>(32 and 28 weeks of gestation) |
| Hai N, 2017                    | 81              | 92.6%<br>(75)                       | n/a            | n/a           | n/a         | n/a        | 18.5%<br>(15)  | n/a            | n/a      | 18.5%<br>(n=15)                  | 3.7%<br>(n=3)                    | 4.9%<br>(n=4)                           | 9.9%<br>(n=8)                  | n/a            | n/a                                                                            | n/a                              | 2.5%<br>(n=2) | n/a                  | n/a           | n/a                                 |
| Hai N, 2021                    | 64              | 79.7%<br>(51)                       | 65.6%<br>(42)  | n/a           | n/a         | n/a        | n/a            | n/a            | n/a      | n/a                              | n/a                              | 100%                                    | 1.6%<br>(n=1)                  | 26.5%<br>(17)  | 100% vaginal discharge;<br>(2 vaginal discharge>14d with antibiotic treatment) | n/a                              | n/a           | n/a                  | n/a           | n/a                                 |
| Scarperi S, 2015               | 15              | 100%                                | n/a            | n/a           | 20%<br>(1)  | 80%<br>(8) | 0              | n/a            | n/a      | n/a                              | n/a                              | n/a                                     | n/a                            | 13.3%<br>(2)   | 0                                                                              | 0                                | n/a           | n/a                  | n/a           | n/a                                 |
| Stepniewska AK, 2022           | 60              | 53%<br>(32)                         | 52%<br>(31)    | 45%<br>(27)   | n/a         | n/a        | n/a            | 36%<br>(10/31) | -68.7%   | n/a                              | n/a                              | 20%<br>(n=12)                           | 13.3%<br>(n=8)<br>(42, 16-78)  | n/a            | 1.7%<br>(fever, treated with antibiotics)                                      | n/a                              | 6.7%<br>(4)   | 2                    | 2             | 1<br>(35 weeks of gestation)        |
|                                |                 | 63%<br>(10/16 amenorrhoea excluded) | 67%<br>(14/21) | n/a           | n/a         | n/a        | 19%<br>(3/16)  | 24% (5/14)     | -64.3%   |                                  |                                  |                                         |                                |                |                                                                                |                                  |               |                      |               |                                     |
| Sha A Dai Ti WFE, 2018         | 30              | n/a                                 | n/a            | n/a           | 67%<br>(20) | 30%<br>(9) | 3%<br>(1)      | n/a            | n/a      | n/a                              | n/a                              | n/a                                     | n/a                            | oc-casionally  | fever (oc-casionally)                                                          | n/a                              | n/a           | n/a                  | n/a           | n/a                                 |
|                                | Weighted Mean   | 69.3%                               | 24.0%          | 59.4%         | 50.1%       | 44.6%      | 10.9%          |                |          |                                  |                                  | 9.9%                                    | 10.8%                          |                |                                                                                |                                  |               |                      |               |                                     |
|                                | Weighted SD ±   | 26.4%                               | 31.3%          | 12.5%         | 14.3%       | 15.2%      | 6.9%           |                |          |                                  |                                  | 6.3%                                    | 1.5%                           |                |                                                                                |                                  |               |                      |               |                                     |
| *p<0.05 vs. previos assessment |                 |                                     |                |               |             |            |                |                |          |                                  |                                  |                                         |                                |                |                                                                                |                                  |               |                      |               |                                     |
