# Supplementary material for: Radiofrequency Ablation for Adenomyosis
Source: MDPI journal article supplement (doi:10.3390/jcm12093069), 2023-04-23
Supplement: s1 [file s1]

## NIH Quality Assessment Tool for Before-After (Pre-Post) Studies With No Control Group

[The National Institutes of Health \(NIH\) quality assessment tool \(https://www.nhlbi.nih.gov/health-topics/study-quality-assessment-tools\)](https://www.nhlbi.nih.gov/health-topics/study-quality-assessment-tools)
