# Supplementary material for: Radiofrequency Ablation for Adenomyosis
Source: MDPI journal article supplement (doi:10.3390/jcm12093069), 2023-04-23
Supplement: s1 [file s1]

Supplementary Table S4: Outcome 2

| Pain Scores (VRS/VAS/PAIN) |              |              |              |               |        |                                                                     | Symptom Severity Score (SSS) |              |        |                                                      | Pictorial Bleeding Assessment Chart (PBAC) |                |                |                |           |        |                                                                               | Morphologic Changes                                                                |                    |               |                           |                    |     |  |  |
|----------------------------|--------------|--------------|--------------|---------------|--------|---------------------------------------------------------------------|------------------------------|--------------|--------|------------------------------------------------------|--------------------------------------------|----------------|----------------|----------------|-----------|--------|-------------------------------------------------------------------------------|------------------------------------------------------------------------------------|--------------------|---------------|---------------------------|--------------------|-----|--|--|
| Baseline                   | Outcome      |              |              |               |        |                                                                     | Baseline                     | Outcome      |        |                                                      | Baseline                                   | Outcome        |                |                |           |        |                                                                               | Baseline                                                                           | Outcome            |               | Baseline                  | Outcome            |     |  |  |
|                            | 1 month      | 3 months     | 6 months     | 12 months     | %      | 12+ months                                                          |                              | 12 months    | %      | 12+ months                                           |                                            | 1 month        | 3 months       | 6 months       | 12 months | %      | 12+ months                                                                    | mean Vol. of lesion (cm3)                                                          | (cm3) at 12 months | %             | mean Vol. of uterus (cm3) | (cm3) at 12 months | %   |  |  |
| 3.91 ± 0.98 (VRS 0-5)      | n/a          | n/a          | n/a          | 1.92 ± 0.79*  | -50.9% | n/a                                                                 | 21.8 ± 5.5                   | 16.4 ± 4.8   | -34.8% | n/a                                                  | n/a                                        | n/a            | n/a            | n/a            | n/a       | n/a    | 71.1 ± 57.3                                                                   | n/a                                                                                | -67.3%             | 238.3 ± 129.8 | n/a                       | -47.6%             |     |  |  |
| 18.1 (PAIN 0–20)           | 13.3* ± 12.5 | 13.7* ± 13.0 | 13.7* ± 10.6 | 5.62 (n=26)   | -69.0% | 8.87; 24 months (n=23) 7.8; 36 months (n=15); 1.29; 48 months (n=7) | n/a                          | n/a          | n/a    | n/a                                                  | 234 (19–815)                               | 104.3* ± 178.6 | 118.4* ± 194.1 | 120.0* ± 139.3 | 111.58    | -52.3% | 131.0; 24 months, (n=23)<br>248.1; 36months, (n=15)<br>106.4; 48 months (n=7) | n/a                                                                                | n/a                | n/a           | n/a                       | n/a                | n/a |  |  |
| 6.9±0.8 (VAS 0-10)         | n/a          | n/a          | n/a          | 1.9 ± 1.2*    | -72.5% | n/a                                                                 | 44.17 ± 11.3                 | 11.85 ± 8.24 | -73.2% | n/a                                                  | n/a                                        | n/a            | n/a            | n/a            | n/a       | n/a    | 58.4 ± 35.6                                                                   | 29.6 ± 16.2                                                                        | -41.2%             | 260.9 ± 149.3 | 153.4 ± 93.7*             | -41.2%             |     |  |  |
| 7.2 ± 1.9 (VAS 0-10)       | n/a          | 3.5 ± 1.3*   | 3.0 ± 1.1*   | 2.2 ± 0.9*    | -69.4% | 2.3 ± 0.8; 24 months<br>2.3 ± 1.0; 36 months                        | 36.4 ± 13.6                  | 16.1 ± 4.1*  | -65.8% | 17.6 ± 5.6*<br>24 months<br>17.5 ± 4.3*<br>36 months | n/a                                        | n/a            | n/a            | n/a            | n/a       | n/a    | n/a                                                                           | n/a                                                                                | n/a                | 307.0 ± 183.1 | 132.2 ± 60.2*             | excluded (-57.0%)  |     |  |  |
| 9.1 (VAS 0-10)             | n/a          | 5.4* (n=15)  | 3.8* (n=13)  | 2.6 (n=10)    | -71.4% | n/a                                                                 | n/a                          | n/a          | n/a    | n/a                                                  | n/a                                        | n/a            | n/a            | n/a            | n/a       | n/a    | 60 (18-128)                                                                   | 20.8                                                                               | -63.7%             | n/a           | n/a                       | -65.3%             |     |  |  |
| 7.4 (VAS 0-10)             | n/a          | n/a          | n/a          | 3.3* (Δ 4.1)  | -55.4% | n/a                                                                 | n/a                          | n/a          | n/a    | n/a                                                  | n/a                                        | n/a            | n/a            | n/a            | n/a       | n/a    | n/a                                                                           | Disappearance in 11 (20%)<br>Reduction in 36 (64%)<br>No Change in 12 (21%) (n=56) | n/a                | n/a           | n/a                       | n/a                |     |  |  |
| 7.1 (VAS 0-10)             | n/a          | n/a          | n/a          | 4.0* (Δ 2.73) | -43.7% |                                                                     |                              |              |        |                                                      |                                            |                |                |                |           |        |                                                                               |                                                                                    |                    |               |                           |                    |     |  |  |
| n/a                        | n/a          | n/a          | n/a          | n/a           | n/a    | n/a                                                                 | n/a                          | n/a          | n/a    | n/a                                                  | n/a                                        | n/a            | n/a            | n/a            | n/a       | n/a    | 25.50 (44.18)                                                                 | 0 (3.28)                                                                           | -100.0%            | n/a           | n/a                       | n/a                |     |  |  |
| 7.7 (adj)                  |              |              |              | 2.7 (adj)     | -63.4% |                                                                     | 34.9                         | 14.5         | -59.1% |                                                      |                                            |                |                |                |           |        |                                                                               |                                                                                    | -61.1%             |               |                           | -46.0%             |     |  |  |
| 0.89                       |              |              |              | 0.75          | 9.0%   |                                                                     | 9.3                          | 2.2          | 16.6%  |                                                      |                                            |                |                |                |           |        |                                                                               |                                                                                    | 20.5%              |               |                           | 11.9%              |     |  |  |
