# Supplementary material for: Radiofrequency Ablation for Adenomyosis
Source: MDPI journal article supplement (doi:10.3390/jcm12093069), 2023-04-23
Supplement: s1 [file s1]

Supplementary Table S1: Study Design

| Study Design/Properties |                                                                                                                                                                       |                   |             |                     |                                                                   |               |                | Epidimiological data |             | Follow up         |                                                             |                                                                                           |                        | Study Quality |
|-------------------------|-----------------------------------------------------------------------------------------------------------------------------------------------------------------------|-------------------|-------------|---------------------|-------------------------------------------------------------------|---------------|----------------|----------------------|-------------|-------------------|-------------------------------------------------------------|-------------------------------------------------------------------------------------------|------------------------|---------------|
| Author                  | Study                                                                                                                                                                 | Year              | Country     | Study Design        |                                                                   |               | No of patients | mean age             | BMI (kg/m2) | time (months)     | loss to follow up (12 months)                               | Assessment                                                                                |                        | NIH Rating    |
|                         |                                                                                                                                                                       |                   |             |                     |                                                                   |               |                |                      |             |                   |                                                             | Modality                                                                                  | point of time (months) |               |
| Lin XL, 2020            | Comparison between microwave ablation and radiofrequency ablation for treating symptomatic uterine adenomyosis                                                        | 10/2015 - 10/2017 | China       | Experimental (II)   | single-center, randomized, parallel and controlled clinical trial | prospective   | 65             | 38.9 ± 5.0           | 22.0 ± 3.3  | 12                | none                                                        | post ablation CEUS and cMRI at day3, SSS and VRS Scores thereafter including TVUS.        | (day 3 MRI) 3,12       | good          |
| Nam JH, 2020            | Pregnancy and symptomatic relief following ultrasound-guided transvaginal radiofrequency ablation in patients with adenomyosis                                        | 08/2004 - 11/2014 | South Korea | descriptive (VI)    | case series                                                       | retrospective | 81             | 35.6 (26–44)         | n/a         | 57.4 (3-129)      | 33.8% (26) on outcome symptoms. 5% (4) on outcome pregnancy | PBAC and PAIN Score                                                                       | 1,3,6,12,24,36,48      | fair          |
| Hai N, 2017             | Ultrasound-guided transcervical radiofrequency ablation for symptomatic uterine adenomyosis                                                                           | 2013 - 10/2015    | China       | descriptive (VI)    | case series                                                       | retrospective | 81             | 40.0 ± 8.5           | 22.5 ± 2.4  | 12                | 6.9% (6/87)                                                 | post ablation CEUS (= NPV 70%) and then TVUS thereafter. VAS                              | 1,6,12                 | good          |
| Hai N, 2021             | Ultrasound-guided transvaginal radiofrequency ablation combined with levonorgestrel-releasing intrauterine system for symptomatic uterine adenomyosis treatment       | 01/2013 - 01/2016 | China       | descriptive (VI)    | case series                                                       | retrospective | 64             | 39.2 ± 4.9           | 22.5 ± 2.9  | 12                | 12.3% (9/73)                                                | post ablation CEUS (= NPV 70%) and then TVUS thereafter. Blood sampels at 3,6 months, VAS | 3, 6,12, 24, 36        | good          |
| Scarperi S, 2015        | Laparoscopic Radiofrequency Thermal Ablation for Uterine Adenomyosis                                                                                                  | n/a               | Italy       | descriptive (VI)    | case series                                                       | prospective   | 15             | 40.1 (34–46)         | 23.9        | 9 (3-12)          | 33% (5)                                                     | Ultrasound/VAS                                                                            | 3, 6, 9, 12            | fair          |
| Stepniewska AK, 2022    | Heat can treat: long-term follow-up results after uterine-sparing treatment of adenomyosis with radiofrequency thermal ablation in 60 hysterectomy candidate patients | 03/2011 - 06/2019 | Italy       | observational (III) | cohort study                                                      | retrospective | 60             | 43 (38–50) ± 3.0     | n/a         | 56 (10–115, ± 29) | none                                                        | Ultrasound/Scores                                                                         | not specified          | good          |
| Sha A Dai Ti WFE, 2018  | Clinical evaluation of three methods in the treatment of adenomyosis                                                                                                  | 01/2013 - 01/2016 | China       | observational (III) | cohort study                                                      | retrospective | 30             | 37.33 ± 4.25         | n/a         | 12                | n/a                                                         | n/a                                                                                       | n/a                    | poor          |
|                         | <b>Weighted Mean</b>                                                                                                                                                  |                   |             |                     |                                                                   |               |                | <b>39.0</b>          | <b>22.4</b> | <b>27.8</b>       | <b>12.5%</b>                                                |                                                                                           |                        |               |
|                         | <b>Weighted SD ±</b>                                                                                                                                                  |                   |             |                     |                                                                   |               |                | <b>2.3</b>           | <b>0.4</b>  | <b>21.6</b>       | <b>13.4%</b>                                                |                                                                                           |                        |               |
