# Supplementary material for: Radiofrequency Ablation for Adenomyosis
Source: MDPI journal article supplement (doi:10.3390/jcm12093069), 2023-04-23
Supplement: s1 [file s1]

File S3:

## NIH Quality Assessment Tool for Randomized Trials

|              | 1. Was the study described as randomized, a randomized trial, a randomized clinical trial, or an RCT? | 2. Was the method of randomization adequate (i.e., use of randomly generated assignment)? | 3. Was the treatment allocation adequate (i.e., use of could not be predicted)? | 4. Were study participants and providers blinded to treatment group assignment? | 5. Were the people assessing the outcomes blinded to the participants' group assignment? | 6. Were the groups similar at baseline on important characteristics that could affect outcomes (e.g., demographics, risk factors, co-morbid conditions)? | 7. Was the overall drop-out rate from the study at endpoint 20% or lower of the number allocated to treatment? | 8. Was the differential drop-out rate (between treatment groups) at endpoint 15 percentage points or lower? | 9. Was there high adherence to the intervention protocols for (e.g., similar background treatments)? | 10. Were other interventions avoided or similar in the groups implemented consistently across all study participants? | 11. Were outcomes assessed using valid and reliable measures, large to be able to detect a difference in the main outcome between groups with at least 80% power? | 12. Did the authors report that the sample size was sufficiently prespecified (i.e., identified before analyses were conducted)? | 13. Were outcomes reported or subgroups analyzed which they were originally assigned, i.e., did they use an intention-to-treat analysis? | 14. Were all randomized participants analyzed in the group to which they were originally assigned, i.e., did they use an | Overall (poor, fair, good) |
|--------------|-------------------------------------------------------------------------------------------------------|-------------------------------------------------------------------------------------------|---------------------------------------------------------------------------------|---------------------------------------------------------------------------------|------------------------------------------------------------------------------------------|----------------------------------------------------------------------------------------------------------------------------------------------------------|----------------------------------------------------------------------------------------------------------------|-------------------------------------------------------------------------------------------------------------|------------------------------------------------------------------------------------------------------|-----------------------------------------------------------------------------------------------------------------------|-------------------------------------------------------------------------------------------------------------------------------------------------------------------|----------------------------------------------------------------------------------------------------------------------------------|------------------------------------------------------------------------------------------------------------------------------------------|--------------------------------------------------------------------------------------------------------------------------|----------------------------|
| Lin XL, 2020 | 1                                                                                                     | 1                                                                                         | 0                                                                               | 0                                                                               | 0                                                                                        | 1                                                                                                                                                        | 1                                                                                                              | 1                                                                                                           | 1                                                                                                    | n/a                                                                                                                   | 1                                                                                                                                                                 | 0                                                                                                                                | 1                                                                                                                                        | 0                                                                                                                        | Fair                       |

The National Institutes of Health (NIH) quality assessment tool (<https://www.nhlbi.nih.gov/health-topics/study-quality-assessment-tools>)
