# Supplementary material for: Radiofrequency Ablation for Adenomyosis
Source: J Clin Med. 2023 Apr 23;12(9):3069. doi: 10.3390/jcm12093069 (PMC10179480; doi:10.3390/jcm12093069)
Supplement: Supplementary file 1 [file jcm-12-03069-s001.zip]

Archive with 7 entries (7 files):
- jcm-2232823-file S1.pdf
- jcm-2232823-file S2.pdf
- jcm-2232823-file S3.pdf
- jcm-2232823-Table S1.pdf
- jcm-2232823-Table S2.pdf
- jcm-2232823-Table S3.pdf
- jcm-2232823-Table S4.pdf
